# Supplementary material
Source: HighWire-hosted journal article supplement (https://jnm.snmjournals.org/highwire/filestream/94794/field_highwire_adjunct_files/0/162388_Supplemental_Data.pdf)
Supplement: 162388_Supplemental_Data.pdf [file 162388_Supplemental_Data.pdf]

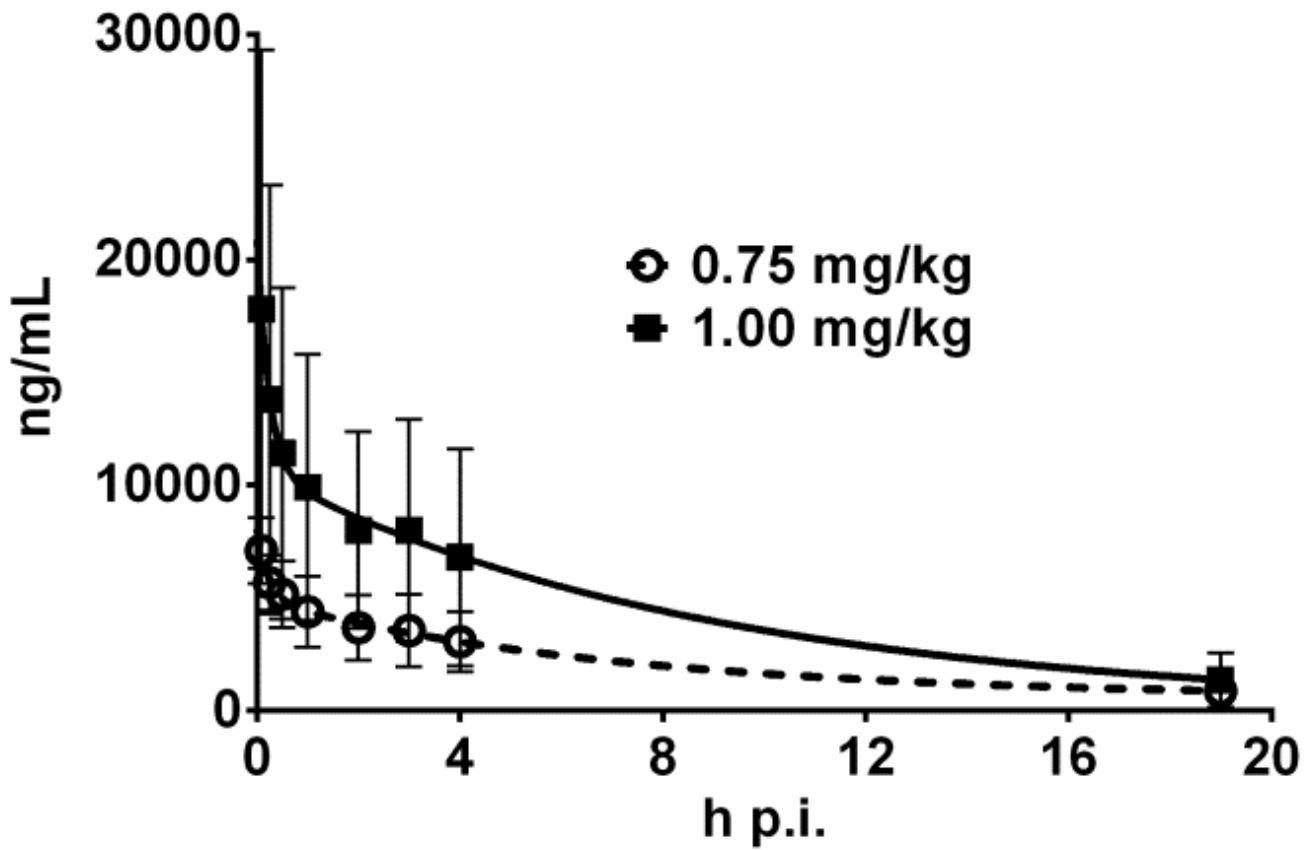

**SUPPLEMENTAL FIGURE 1.** Retention of MAb in plasma, determined by ELISA of repeated blood samples after  $^{211}\text{At}$ -anti-CD45 MAb injection (ng/mL  $\pm$  SD; 0.75 mg/kg,  $n = 5$ ; 1.00 mg/kg,  $n = 3$ ).

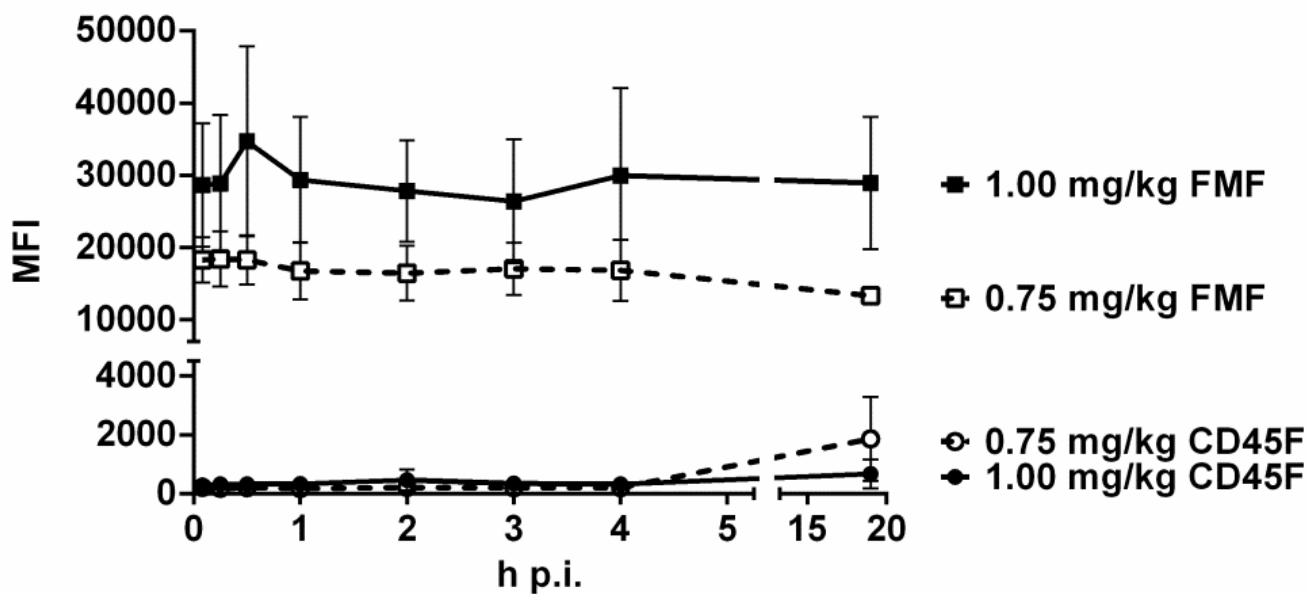

**SUPPLEMENTAL FIGURE 2.** Mean fluorescence intensity gated on lymphocytes (MFI  $\pm$  SD; 0.75 mg/kg,  $n = 5$ ; 1.00 mg/kg,  $n = 5$ ) from flow cytometry of blood samples after staining with FITC-conjugated goat anti-mouse F(ab')<sub>2</sub> (FMF) and FITC-conjugated anti-CD45 MAb (CD45F), respectively. Linear regression analysis demonstrated no significant difference in trend line slopes, excluding the last point for CD45F. However, the y-axis intercepts differed significantly ( $P < 0.0001$ ) between the two MAb doses; the MFI was continuously higher for 1.00 than for 0.75 mg/kg, although the actual difference was minor for CD45F.

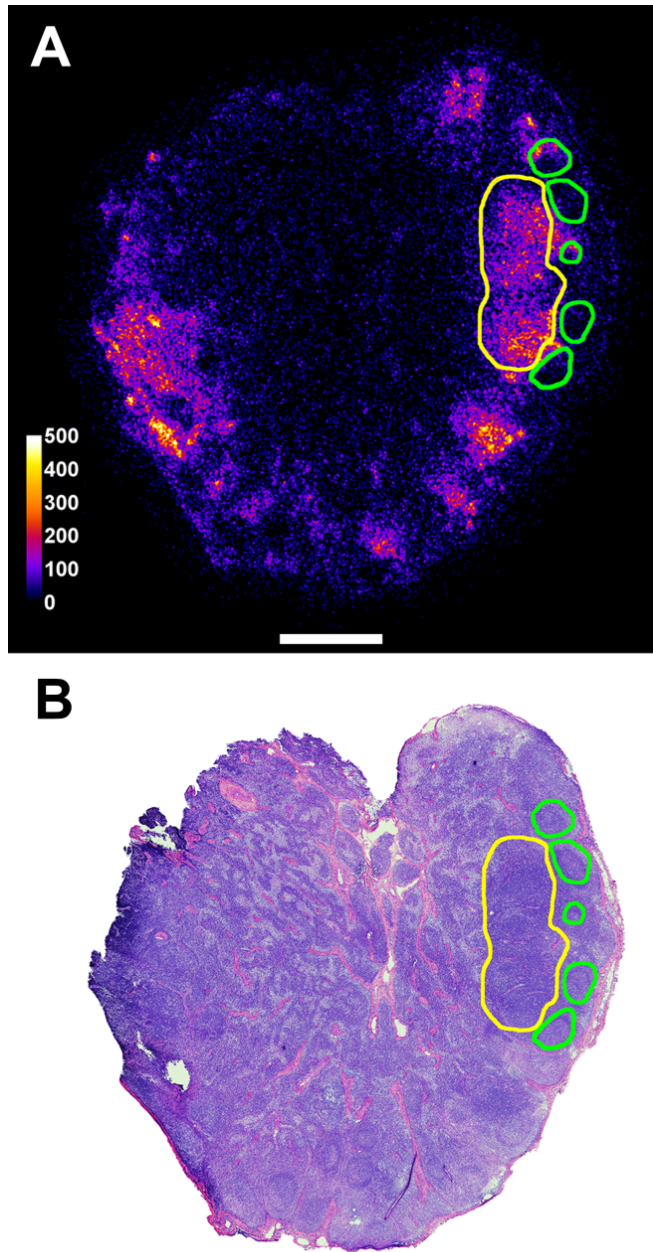

**SUPPLEMENTAL FIGURE 3.** Distribution of  $^{211}\text{At}$  in a cryosectioned lymph node sample from dog H629, biopsied 2 h after injection and imaged using the iQID camera (A). Panel (B) shows the corresponding H&E-stained section; green and yellow lines indicate lymph node follicles and paracortex. The horizontal scale bar represents 1 mm; the color bar shows  $^{211}\text{At}$  activity in microbecquerels.

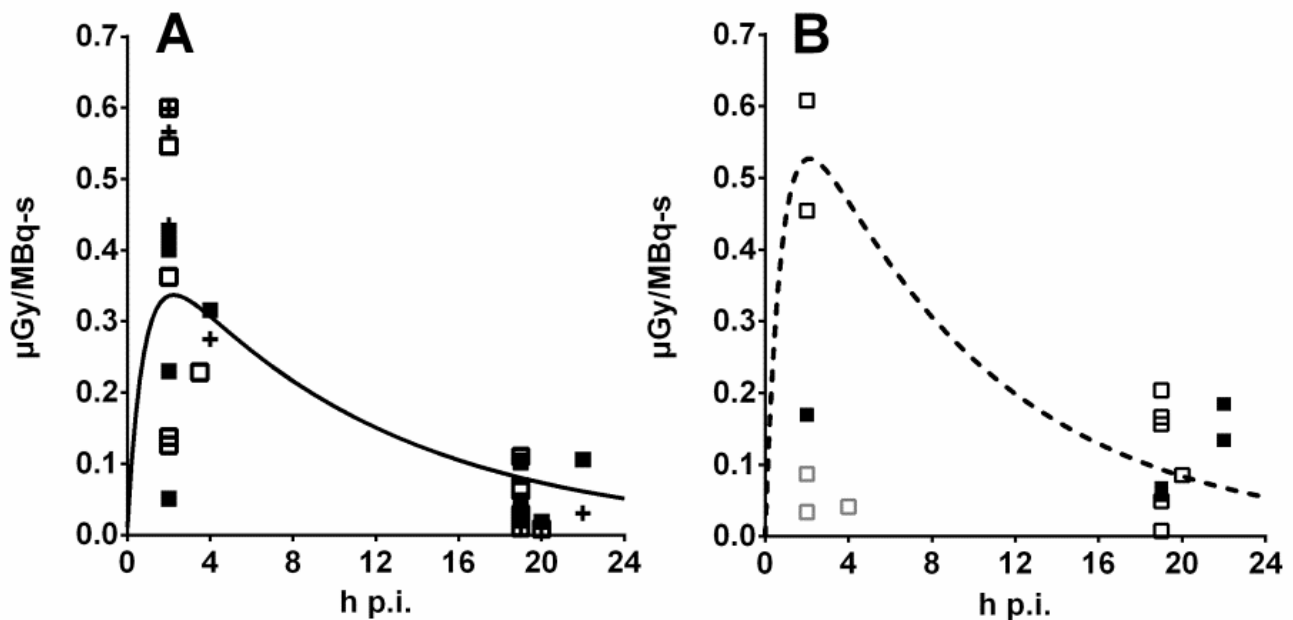

**SUPPLEMENTAL FIGURE 4.** Mean absorbed dose rates to bone marrow (A) and lymph nodes (B) as a function of time after injection. Open and filled squares symbolize dose rates calculated from  $\alpha$ -imaging and radioactivity measurements of macroscopic samples, respectively. The plus signs in A represent bone marrow aspirate data, and the solid line represents a polynomial fit of the mean dose rates calculated from macroscopic bone marrow core samples. In B, the polynomial fit was made for  $\alpha$ -imaging–derived dose rates (dashed line) but using only the early/high lymph node uptake from H632.

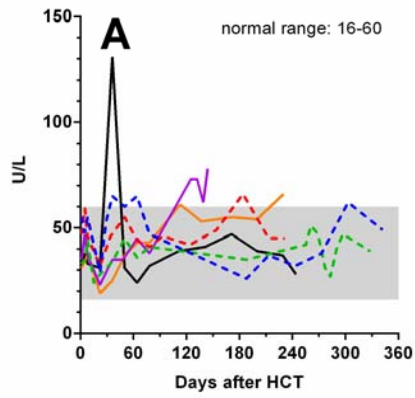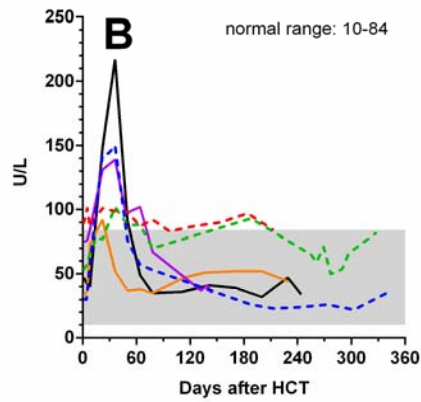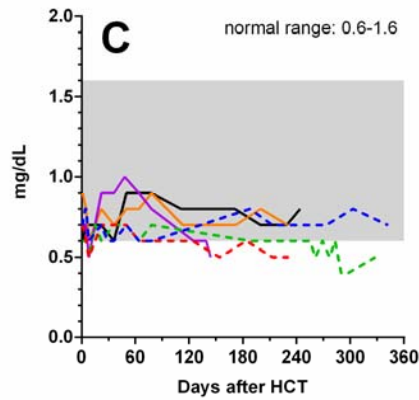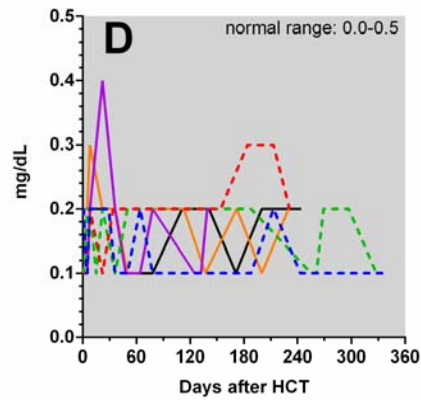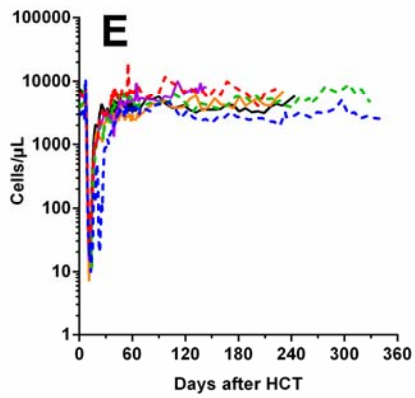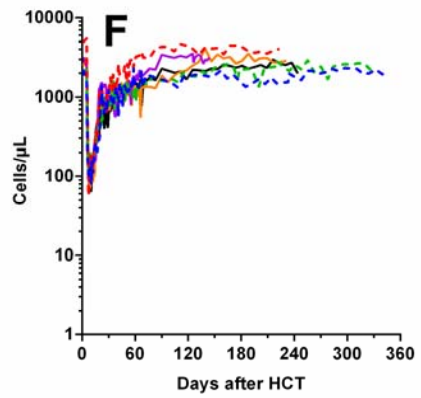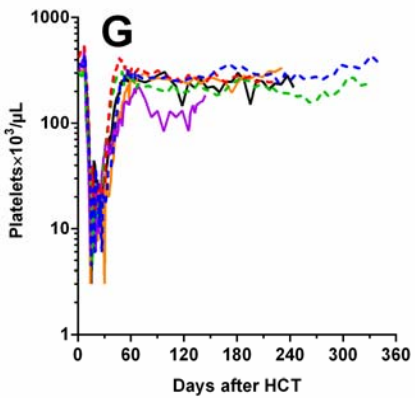

- H543 (11.5 MBq/kg)
- H689 (13.9 MBq/kg)
- H522 (13.9 MBq/kg)
- H629 (14.6 MBq/kg)
- H638 (18.4 MBq/kg)
- H632 (18.7 MBq/kg)

**SUPPLEMENTAL FIGURE 5.** Toxicity indicators in six dogs treated with  $^{211}\text{At}$ -anti-CD45 MAb on day -3 followed by autologous bone marrow transplantation (HCT) on day 0. (A–D) Hepatic and renal function: aspartate aminotransferase (A), alkaline phosphatase (B), bilirubin (C), and creatinine (D). (E–G) Hematologic effects: granulocytes (E), lymphocytes (F), and platelets (G). Gray backgrounds indicate reference ranges in normal dogs; dashed and solid lines represent 0.75 and 1.00 mg MAb/kg, respectively.
